# Supplementary material for: Malic acid-coated iridium nanoparticle-induced cascade enzymatic reactions for norepinephrine detection
Source: Royal Society of Chemistry journal article supplement (doi:10.1039/d3ma00687e), 2024-01-01
Supplement: d3ma00687e1.pdf [file d3ma00687e1.pdf]

## Supplement information

### Malic acid-coated iridium nanoparticles induced cascade enzymatic reactions for norepinephrine detection

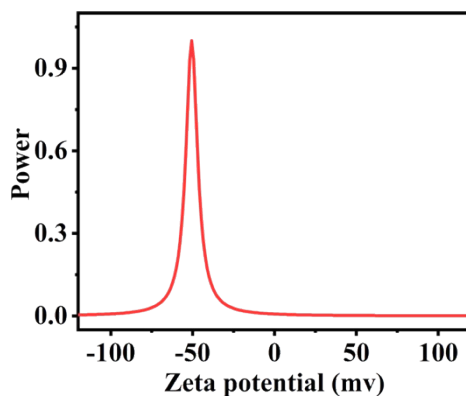

Fig. S1. The zeta potential of MA-IrNPs

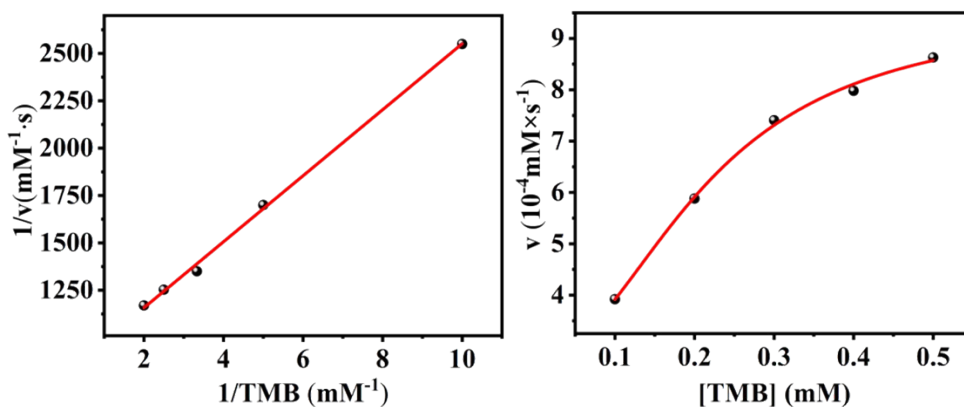

Fig. S2. (A) Steady-state kinetic analysis of oxidase-like of MA-IrNPs. (B) Lineweaver–Burk plot of oxidase-like activity of MA-IrNPs. Reaction conditions: 8  $\mu\text{g}/\text{ml}$  MA-IrNPs in 0.01 M acetate buffer solution (pH=3.8). The kinetic constants of MA-IrNPs was determined in the acetate buffer at different TMB concentrations (0.1-0.5 mM)

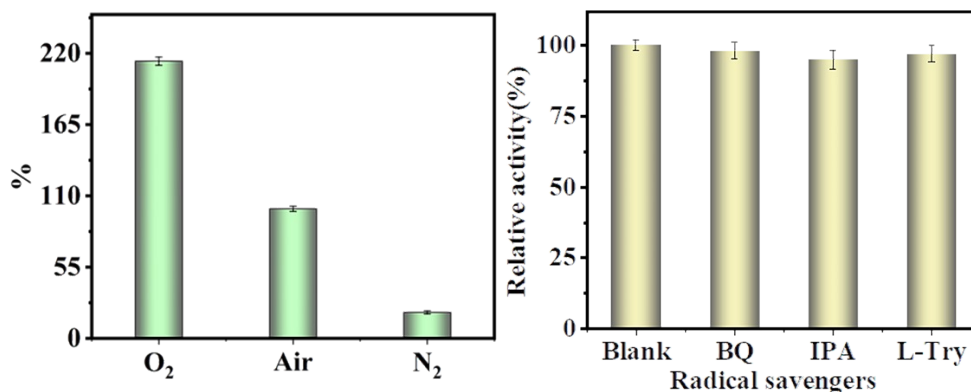

Fig. S3. (A) Effects of different atmospheres on the activity of laccase-like of MA-

IrNPs. (B) Effects of different reactive oxygen scavengers on the activity of laccase-like of MA-IrNPs.

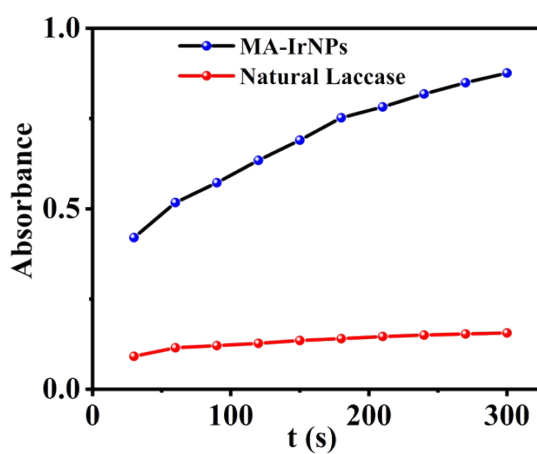

**Fig. S4.** Comparison of reaction velocity of MA-IrNPs and natural laccase

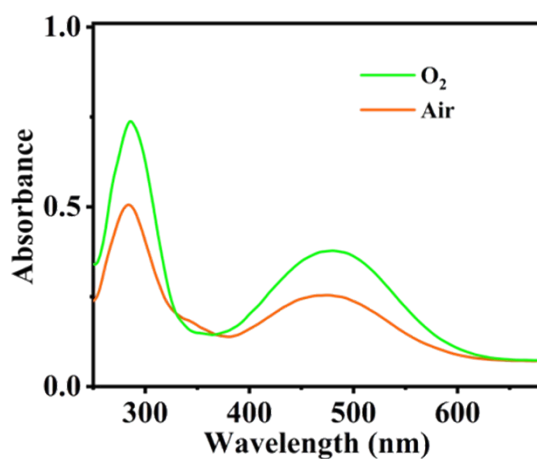

**Fig. S5.** Effect of oxygen on the detection of NE by MA-IrNPs

**Table S1.** Laccase-like activity comparison of kinetic parameters for other similar nanozymes.

| Catalyst        | $K_m$ (mM) | $V_m$ ( $10^{-3}mM \cdot s^{-1}$ ) | ref       |
|-----------------|------------|------------------------------------|-----------|
| Natural laccase | 0.41       | 0.11                               | [1]       |
| Tar-IrNPs       | 0.204      | 5.4                                | [2]       |
| Rh-N/C          | 0.10       | 0.13                               | [3]       |
| CMC-PtNPs       | 0.218      | 0.133                              | [4]       |
| Cu/GMP          | 0.59       | 0.4                                | [5]       |
| MA-IrNPs        | 0.117      | 2.0                                | This work |

1. J. Wang, R. Huang, W. Qi, R. Su, B. P. Binks and Z. He, *Applied Catalysis B: Environmental*, 2019, 254, 452-462.
2. S. Hao, C. Fu, L. Zhou, Z. Guo and Q. Song, *J Mater Chem B*, 2023, 11, 2770-2777.
3. J. Guan, M. Wang, R. Ma, Q. Liu, X. Sun, Y. Xiong and X. Chen, *Sensors and Actuators B: Chemical*, 2023, 375, 132972
4. L. Yang, X.-Y. Guo, Q.-H. Zheng, Y. Zhang, L. Yao, Q.-X. Xu, J.-C. Chen, S.-B. He and W. Chen, *Sensors and Actuators B: Chemical*, 2023, 393, 134165.
5. H. Liang, F. Lin, Z. Zhang, B. Liu, S. Jiang, Q. Yuan and J. Liu, *ACS Appl Mater Interfaces*, 2017, **9**, 1352-1360.
